# Supplementary material
Source: Springer Nature journal article supplement (https://www.springermedizin.de/resource/supplementary/13012_2013_773_MOESM1_ESM.pdf/9630658)
Supplement: MOESM1 [file 9630658]

**Breast Cancer EBI:**  
As you go, spread  
the word: African  
American women  
and breast health

**Prostate Cancer EBI:**  
A brother to brother  
guide about  
prostate cancer and  
screening

**Colorectal Cancer  
EBI: Take charge of  
your health: A  
spiritual guide to  
colorectal cancer  
and screening**

Translation Process  
-Branding  
-Localization & updating  
-Online translation

Health  
Ministry  
Guide

CHA  
Manual &  
Power-  
Points

Workshop  
Materials &  
Power-  
Points

Community  
Resource  
Guide

Tracking  
Database

CHA  
Training:  
Traditional

OR

CHA  
Training:  
Technology
